# Supplementary material for: Seasonal changes in endoplasmic reticulum stress and ovarian steroidogenesis in the muskrats (Ondatra zibethicus)
Source: PubMed Central journal article supplement (PMC9941330; doi:10.3389/fendo.2023.1123699), 2023-02-07
Supplement: Image_1.pdf [file Image_1.pdf]

## Supplementary Material

### 1.1 Supplementary Figures

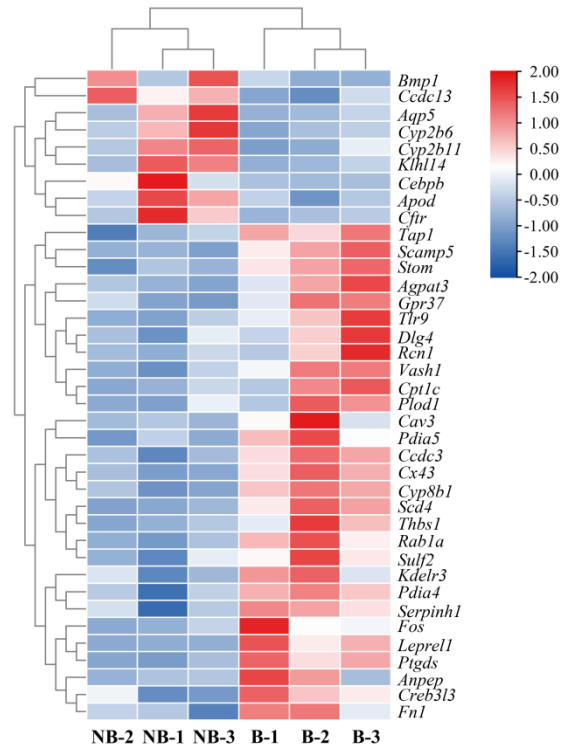

**Supplementary Figure 1.** Hierarchical clustering analysis of DEGs related to endoplasmic reticulum. B, breeding season; NB, non-breeding season.
